# Supplementary material
Source: PubMed Central journal article supplement (PMC2642599)
Supplement: cvn348_1.pdf [file cvn348_1.pdf]

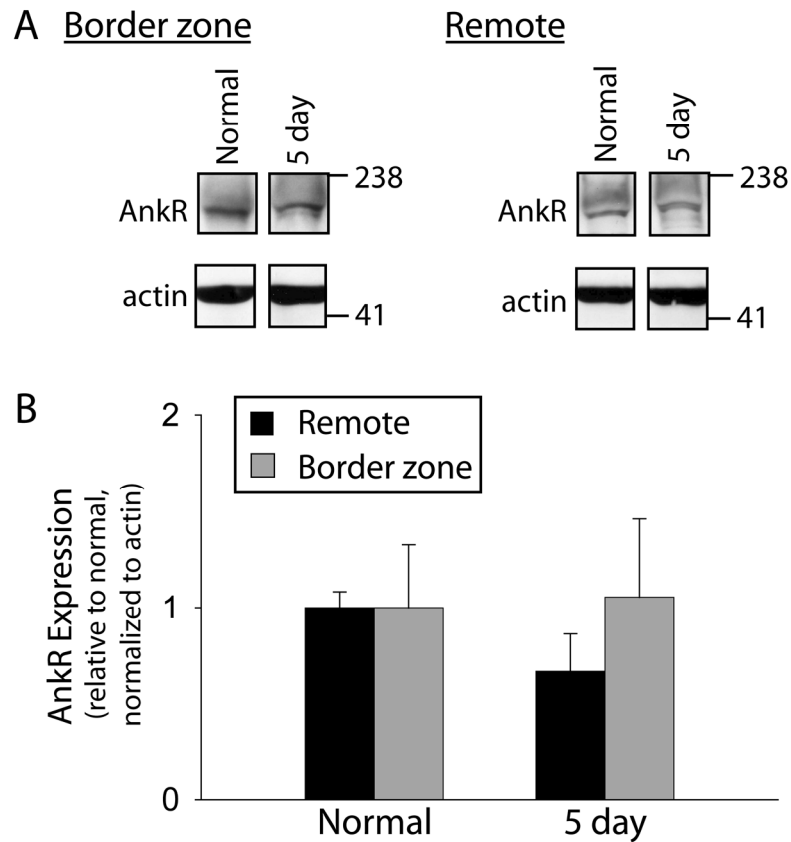

**Supplementary Figure 1** Ankyrin-R protein levels are unchanged in the border zone five days post-occlusion. **(A)** Representative immunoblots and **(B)** densitometric measurements (normalized to actin and expressed relative to normal levels) of ankyrin-R (structurally similar to ankyrin-B) from remote and BZ regions of normal and infarcted hearts. Error bars designate standard deviation ( $p = NS$ ,  $n = 4$  for all groups). Densitometric measurements were made from all samples analyzed on same gel and normalized to corresponding actin levels from the same blot. Equal protein loading was ensured by BCA assay and verified by analysis of Coomassie and Ponceau stains of gel and blots.
